# Supplementary material for: Zero-strain Na4Fe7(PO4)6 as a novel cathode material for sodium–ion batteries
Source: Royal Society of Chemistry journal article supplement (doi:10.1039/c9cc04136b), 2019-01-01
Supplement: c9cc04136b1.pdf [file c9cc04136b1.pdf]

## Supporting Information

### **Na<sub>4</sub>Fe<sub>7</sub>(PO<sub>4</sub>)<sub>6</sub>: A zero-strain iron-based polyanionic cathode for sodium-ion batteries**

Xiangjun Pu,<sup>a</sup> Chao Rong,<sup>b</sup> Shenglong Tang,<sup>a</sup> Huiming Wang,<sup>a</sup> Shunan Cao,<sup>\*a</sup> Yan Ding,<sup>c</sup> Yuliang Cao<sup>\*c</sup> and Zhongxue Chen<sup>\*a</sup>

<sup>a</sup> *Key Laboratory of Hydraulic Machinery Transients, Ministry of Education, School of Power and Mechanical Engineering, Wuhan University, Wuhan 430072, China.*

<sup>b</sup> *Guangxi Ministry-Province Jointly-Constructed Cultivation Base for State Key Laboratory of Processing for Nonferrous Metal and Featured Materials College of Materials Science and Engineering, Guilin University of Technology, Guilin 541004, China.*

<sup>c</sup> *Hubei Key Laboratory of Electrochemical Power Sources, College of Chemistry and Molecular Sciences, Wuhan University, Wuhan 430072, China.*

\* [sacao@whu.edu.cn](mailto:sacao@whu.edu.cn) (S.-A. Cao)

\* [ylcao@whu.edu.cn](mailto:ylcao@whu.edu.cn) (Y.-L. Cao)

\* [zxchen\\_pmc@whu.edu.cn](mailto:zxchen_pmc@whu.edu.cn) (Z.-X. Chen)

---

## Experimental details

### Material Preparation

Na<sub>4</sub>Fe<sub>7</sub>(PO<sub>4</sub>)<sub>6</sub>/C microspheres were prepared by a simple spray-dry method. Typically, stoichiometric amounts of 1.2481 g of NaH<sub>2</sub>PO<sub>4</sub>·2H<sub>2</sub>O, 0.4601 g of NH<sub>4</sub>H<sub>2</sub>PO<sub>4</sub>, 5.656 g of Fe(NO<sub>3</sub>)<sub>3</sub>·9H<sub>2</sub>O and 1.3075 g of C<sub>6</sub>H<sub>8</sub>O<sub>7</sub>·H<sub>2</sub>O were dissolved in 30 mL of deionized water followed by vigorous stirring to form transparent solution. Then the final solution was spray-dried to form a solid precursor. Subsequently, the precursor was heated in Ar atmosphere at 600 °C for 12 h with a heating rate of 2 °C min<sup>-1</sup> to obtain the Na<sub>4</sub>Fe<sub>7</sub>(PO<sub>4</sub>)<sub>6</sub>/C microspheres (denoted NFP/C).

### Materials characterization

XRD measurements were performed on a Bruker AXS diffractometer (D8 Advance) using Cu K $\alpha$  radiation at  $\lambda = 1.54 \text{ \AA}$ . The Rietveld refinement was carried out using the Palleysoftware. SEM test were carried out on a Histachi S-4800 scanning electron microscope (SEM). X-ray photoelectron spectroscopy (XPS) measurements were carried out with a Kratos XSAM800 Ultra Spectrometer. Raman spectroscopic analysis was performed with a Confocal Raman Microspectroscopy (Renishaw, UK) system utilizing a 514.5 nm incident radiation in the range from 400 to 2000 cm<sup>-1</sup>. The calcination temperature was certified by TG, DTG and DTA at a heating rate of 10 °C min<sup>-1</sup> in Ar atmosphere from 40 to 680 °C, and the carbon content was also determined by TG at 10 °C min<sup>-1</sup> from 30 to 750 °C (TA 449 F3, USA). Fourier transformed infrared spectroscopy (FTIR) was performed on a Nicolet Avatar 360 FTIR (Thermo electro, USA).

### Electrochemical measurements

The obtained NFP/C composite was mixed with Super P, and poly (vinylidene fluoride) (PVdF) in a mass ratio of 8:1:1, the mixture was dispersed in N-methyl-2-pyrrolidone (NMP) to form homogeneous slurry. Later, the slurry was pasted on Al foil and dried at 80 °C for 10 h in a vacuum oven. The electrode loading was about 1.5 mg cm<sup>-2</sup>, and the electrode area was 1.44 cm<sup>2</sup>. Electrochemical tests were performed using coin cells with the above electrode as cathode and Na metal as a counter electrode. The electrolyte was 1 mol L<sup>-1</sup> NaClO<sub>4</sub> dissolved in a mixture of ethylene carbonate (EC), diethyl carbonate (DEC) and Fluoroethylene carbonate (FEC) (1:1:0.05 by wt., Zhangjiagang Guotai-Huarong New Chemical Materials Co., Ltd. China), and the separator was a microporous membrane (Celgard 2325). The coin cells (CR2032) were fabricated in an argon-filled glove box with water/oxygen content lower than 0.1 ppm and galvanostatically charged/discharged with a CT2001A (Land Wuhan, China) battery tester. The charge/discharge capacities presented in this work were calculated on the mass of NFP. Cyclic voltammetric measurements were also conducted with the coin cell on a Corrtest 350Helectrochemical workstation (Correst, China).

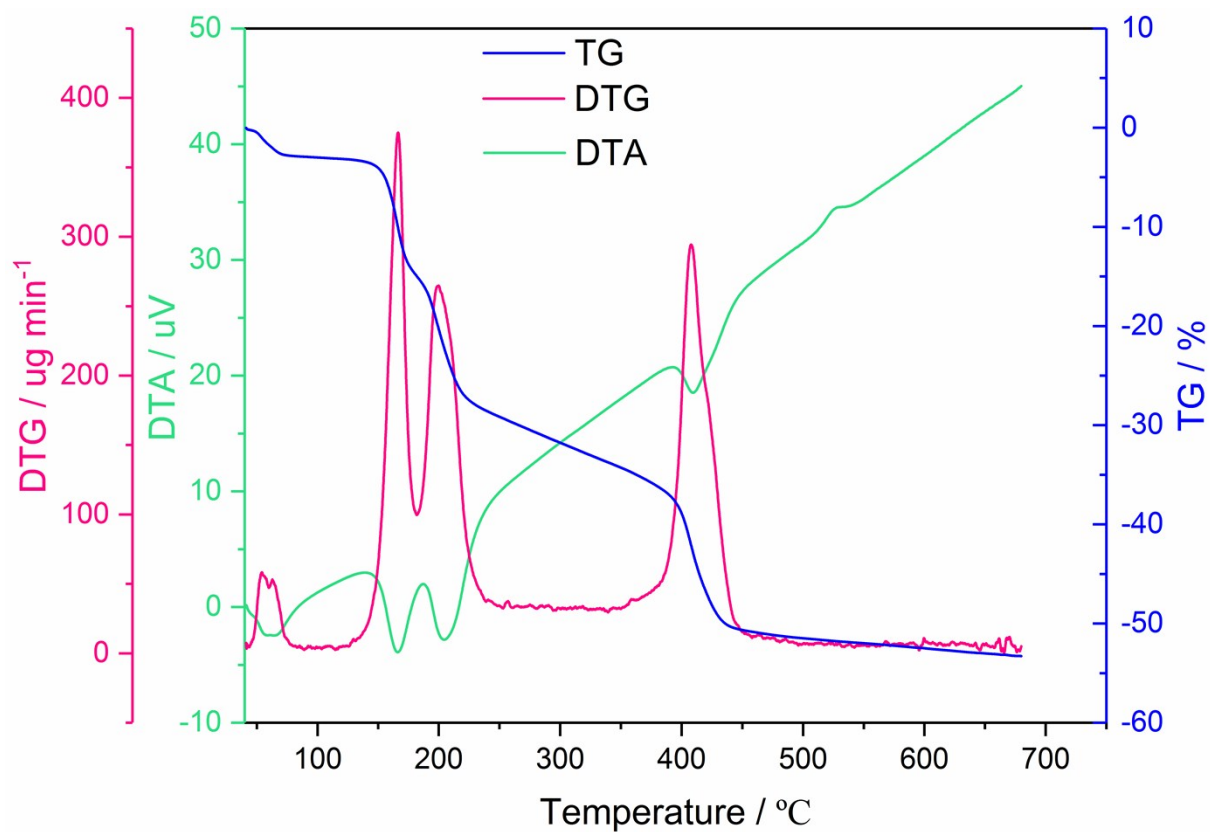

**Fig. S1** Thermogravimetric Analysis (TG) and Differential Thermal Analysis (DTA) of raw materials in Ar atmosphere.

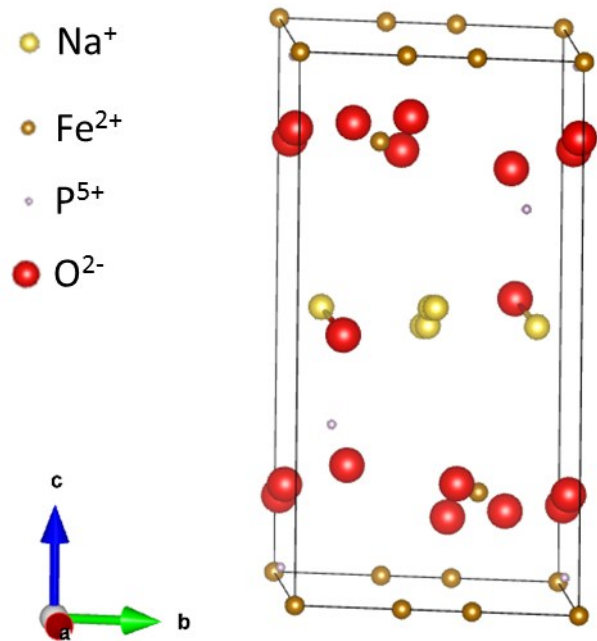

**Fig. S2** Structure view of  $\text{Na}_4\text{Fe}_7(\text{PO}_4)_6$  along the  $a$  axis.

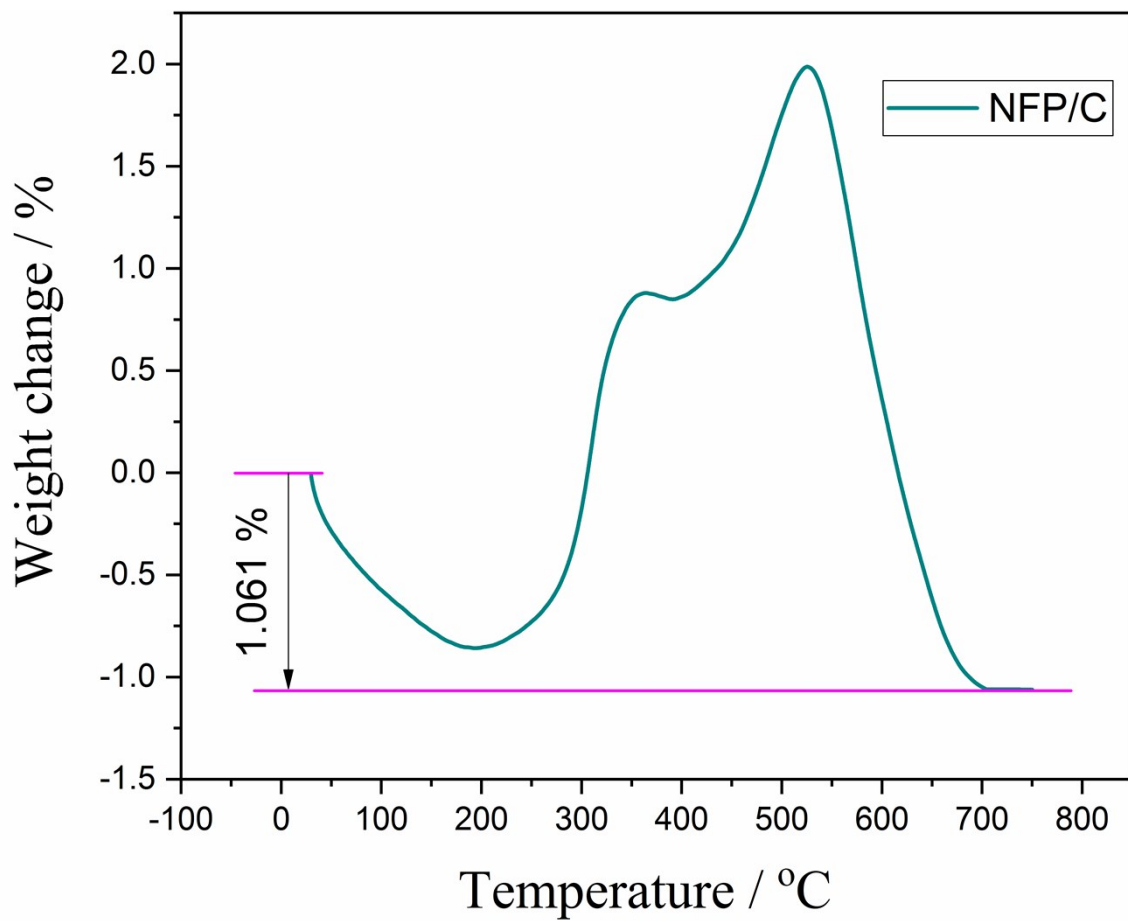

**Fig. S3** Thermogravimetric Analysis (TG) of final NFP/C in air.

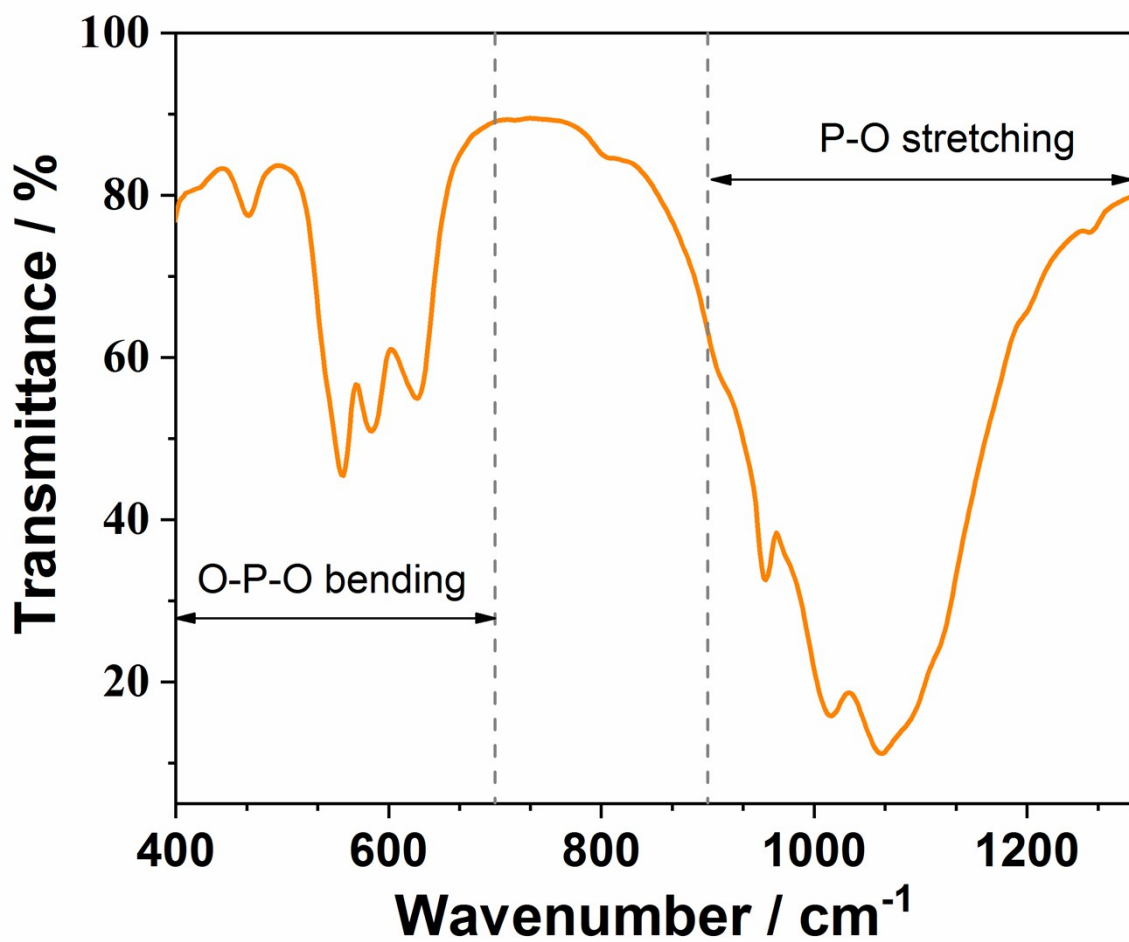

**Fig. S4** The FTIR spectrum of NFP/C showing various bands stemming from PO<sub>4</sub> tetrahedra.

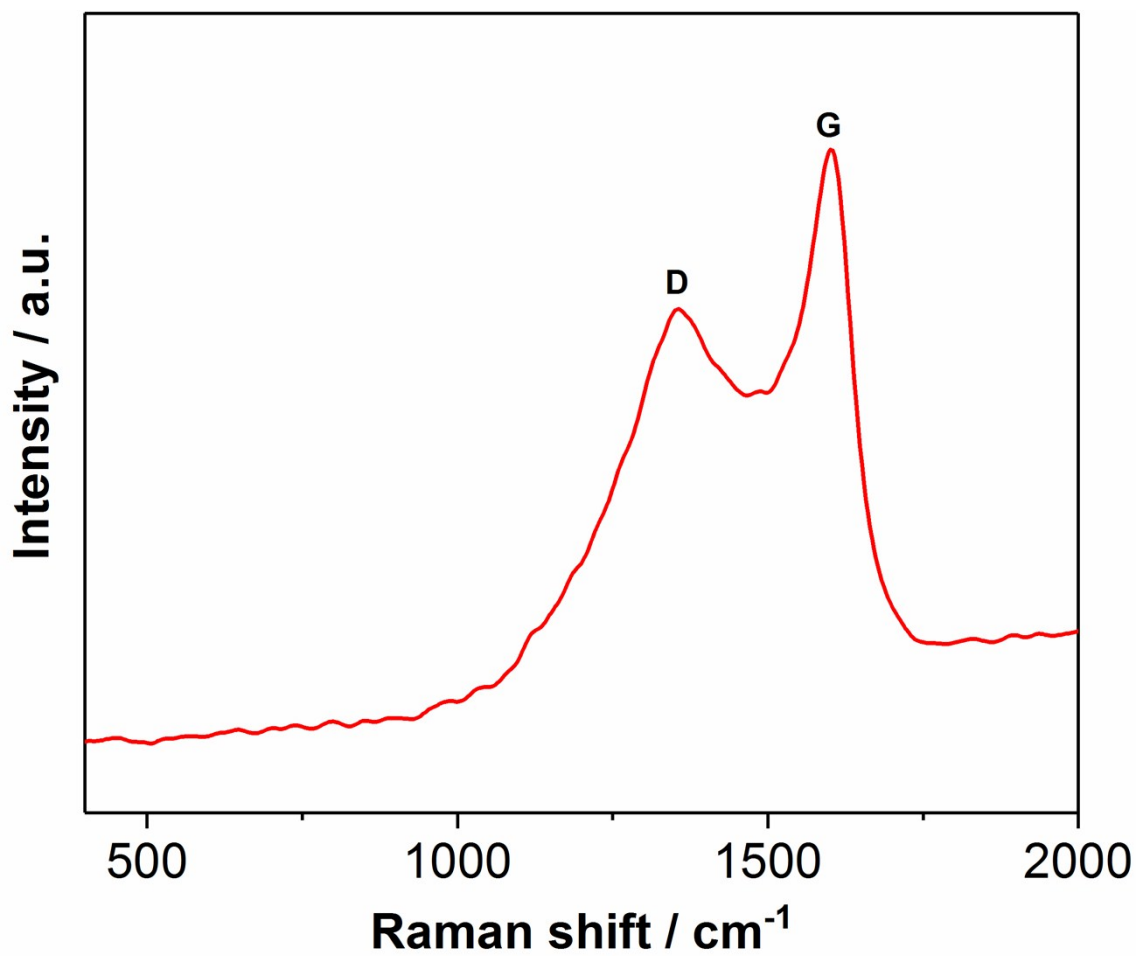

**Fig. S5** The Raman spectrum of NFP/C showing the information of carbon coating.

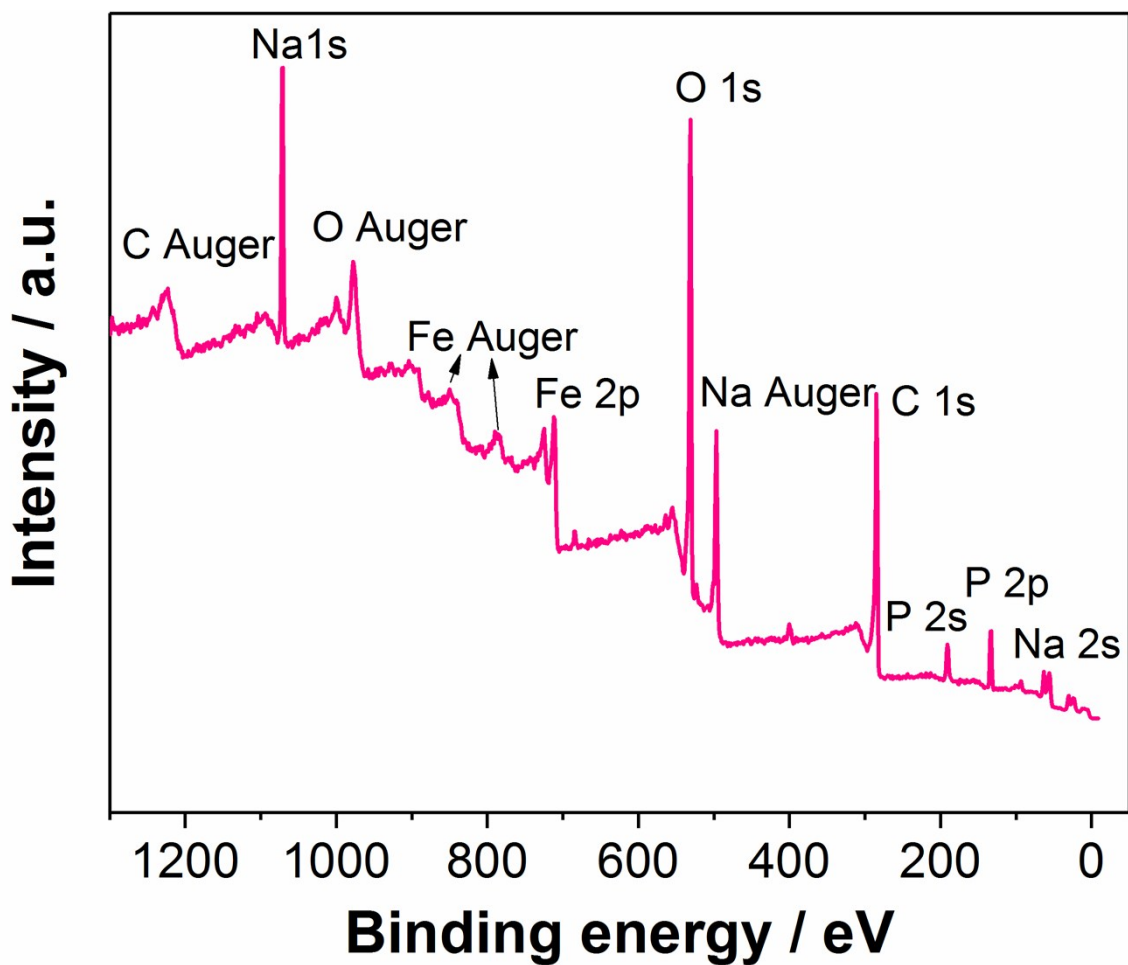

Fig. S6 The full X-ray photoelectron spectroscopy (XPS) spectrum of NFP/C.

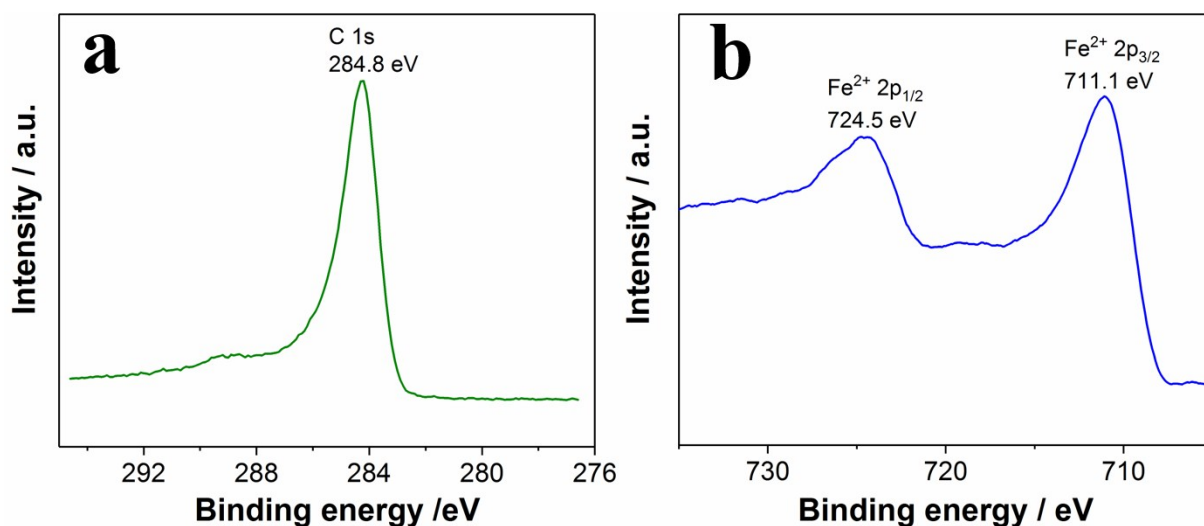

Fig. S7 The XPS spectra of (a) C 1s and (b) Fe 2p of the NFP/C.



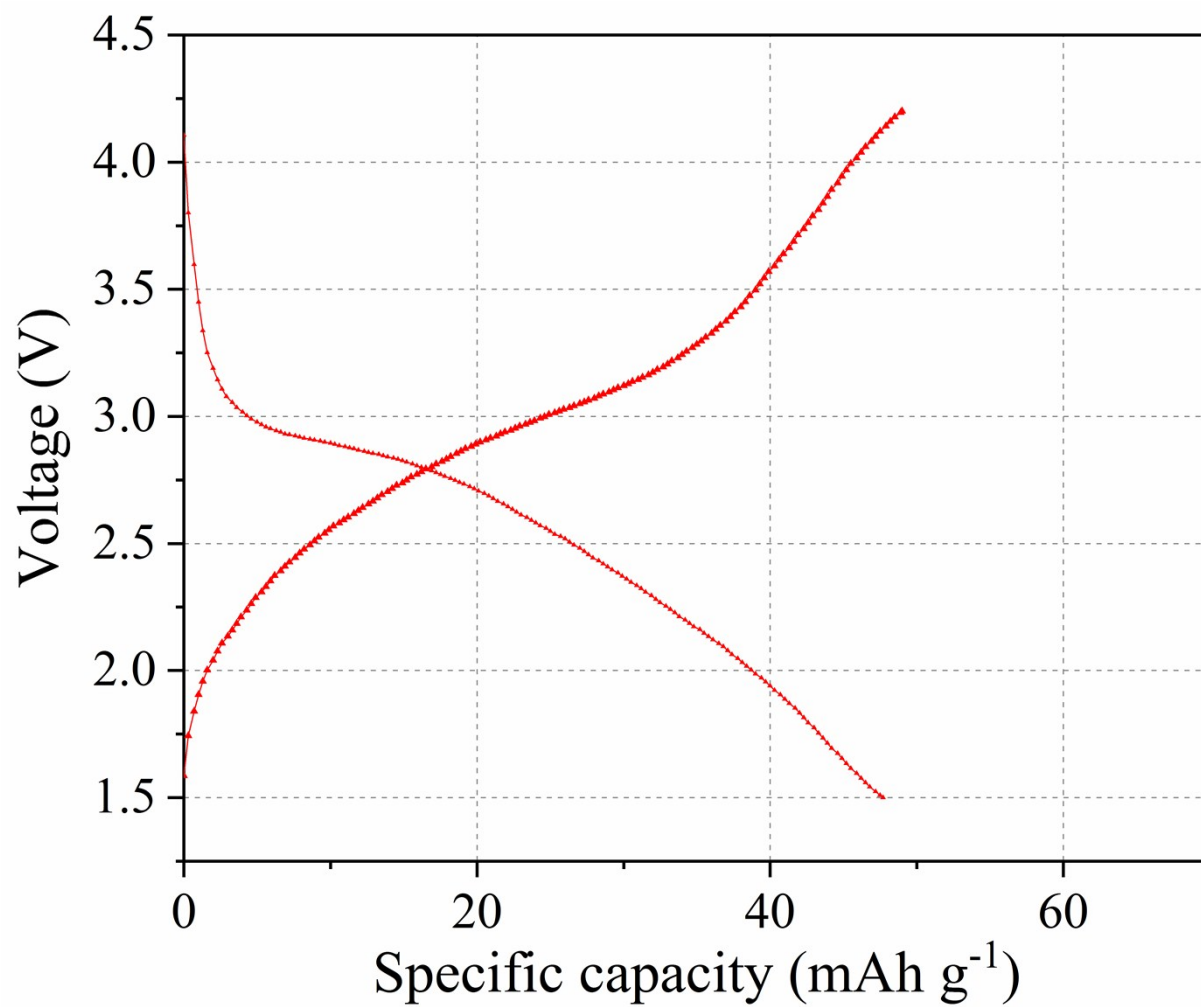

**Fig. S8** The galvanostatic charge/discharge profiles at a current density of 200 mA g<sup>-1</sup>.

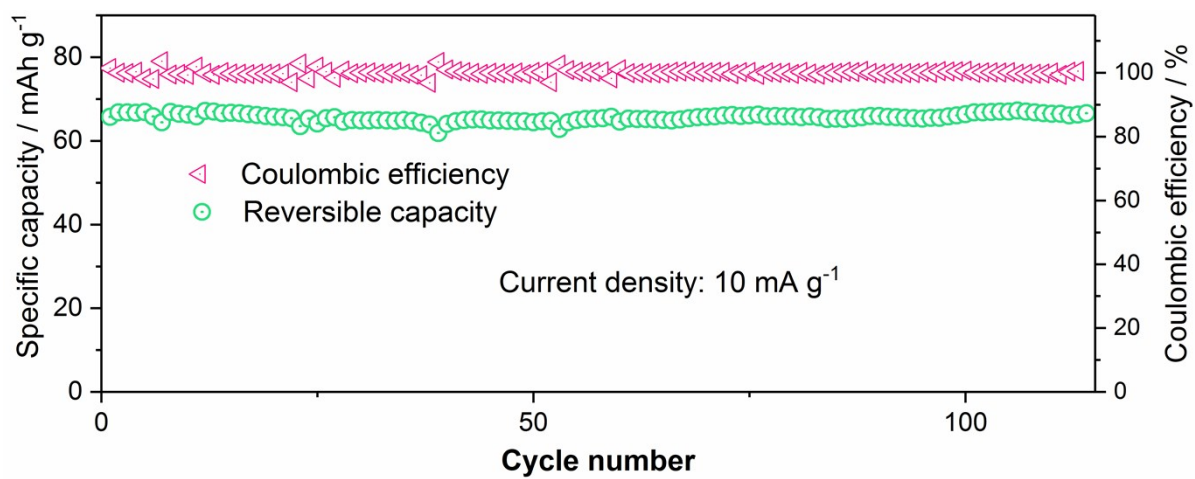

**Fig. S9** Cycling performance of NFP/C electrode at 10 mA g<sup>-1</sup>.

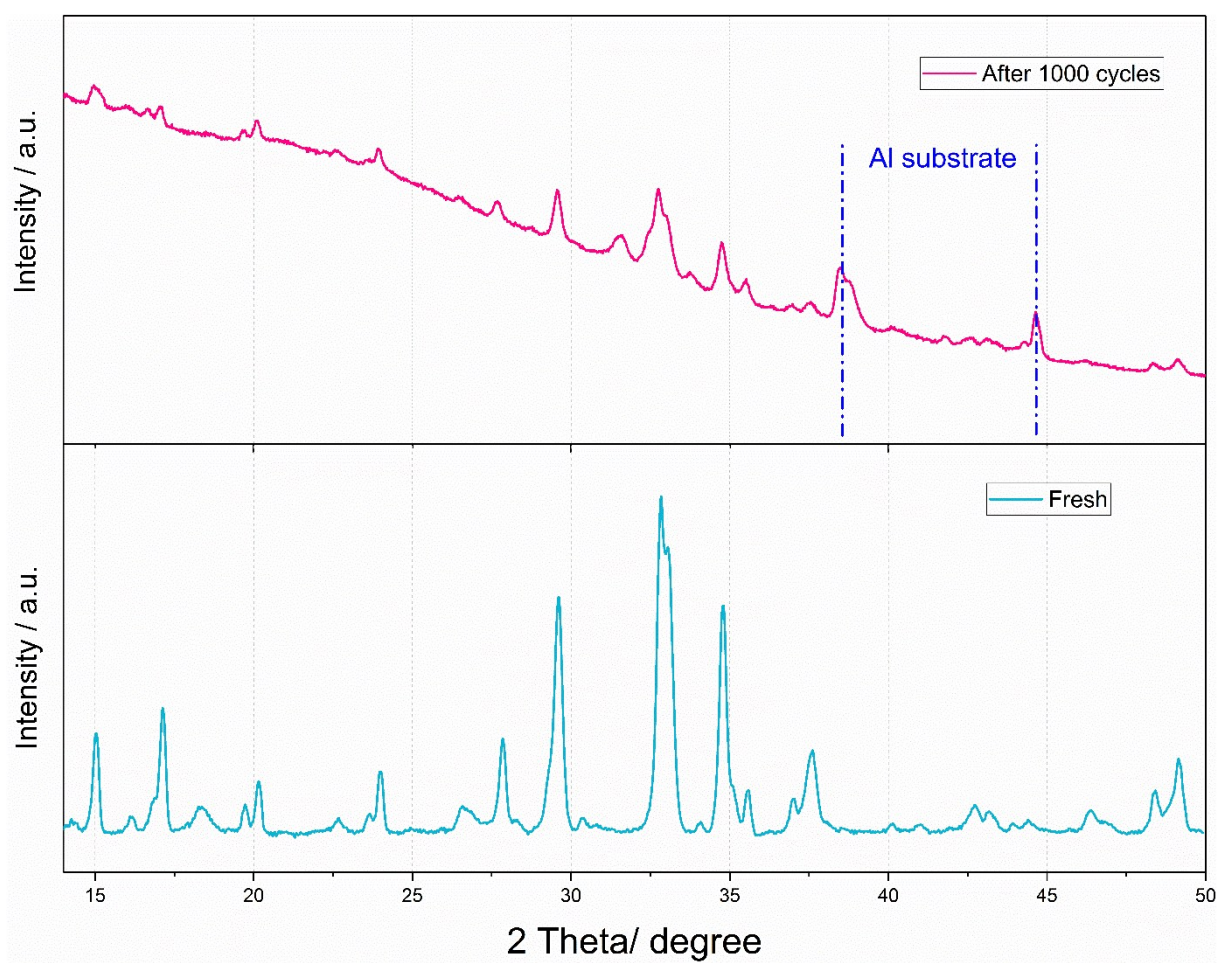

**Fig. S10** XRD pattern of NFP/C after cycling test (comparing with the initial pattern).

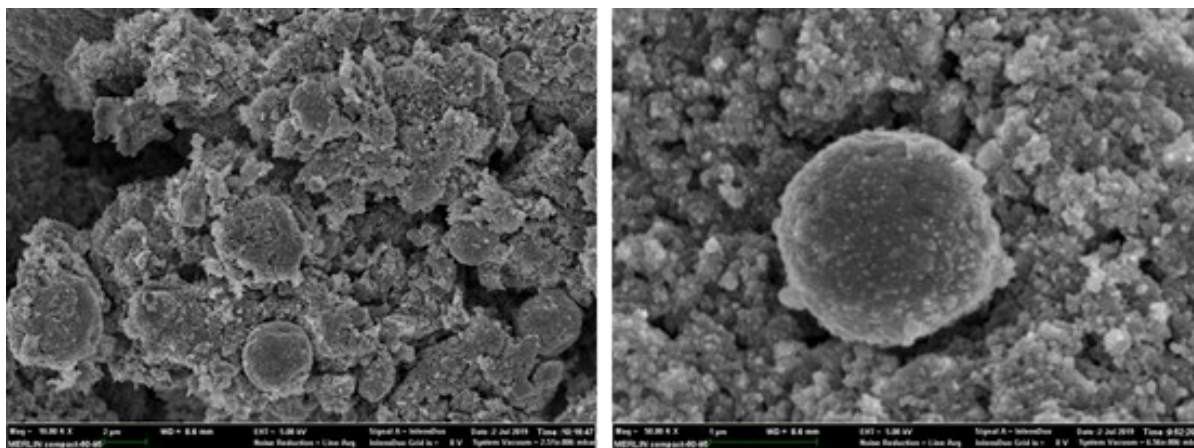

**Fig. S11** SEM images of the  $\text{Na}_4\text{Fe}_7(\text{PO}_4)_6/\text{C}$  electrode after 500 cycles.

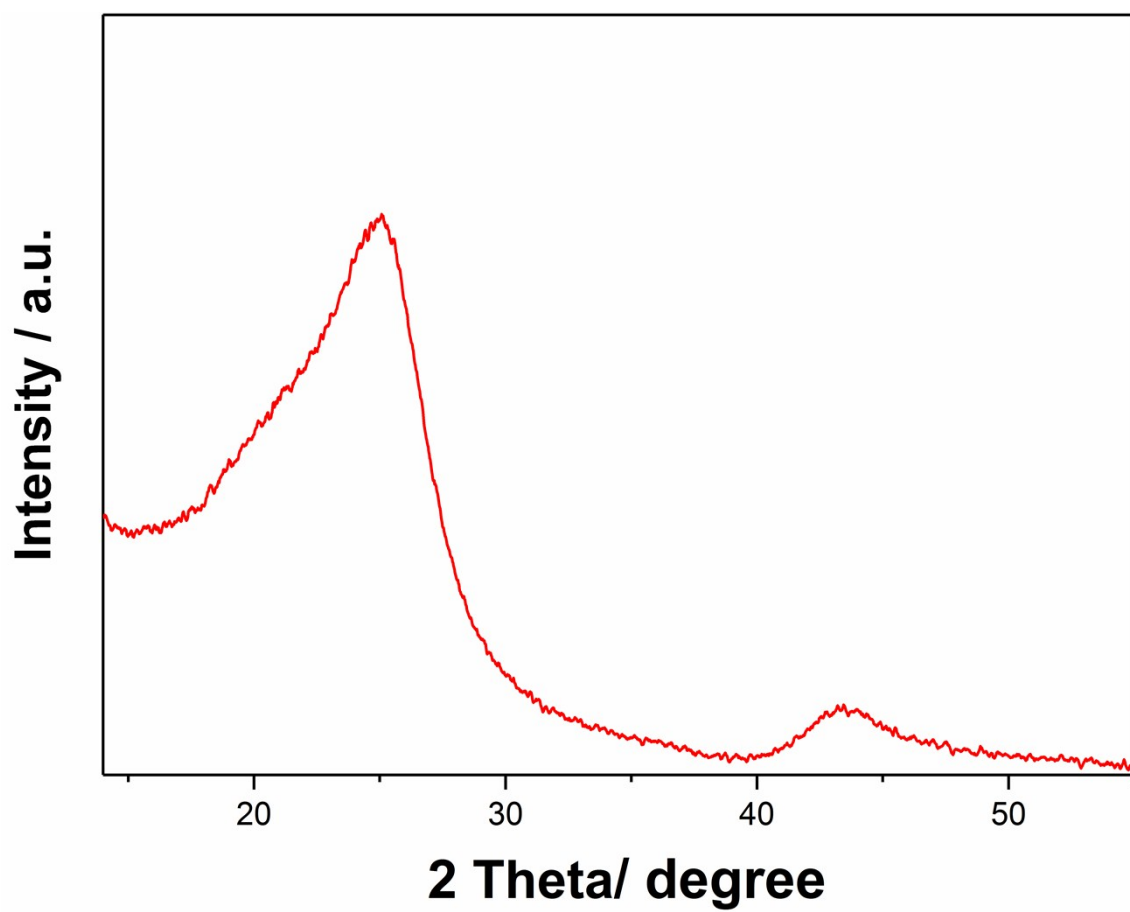

Fig. S12 XRD pattern of super P.

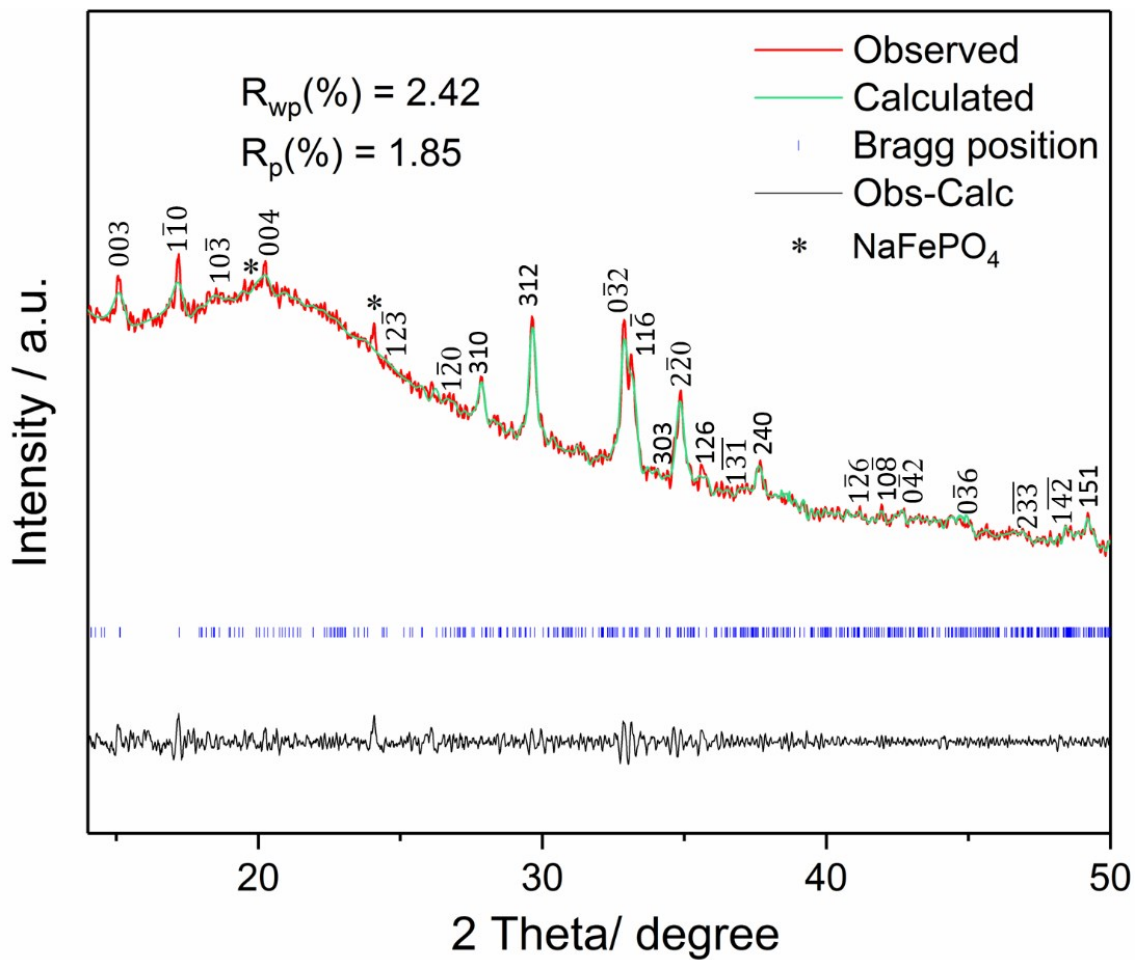

**Fig. S13** Rietveld refinement of X-ray diffraction patterns of NFP/C at 4.2 V. (Desodiation state).
